# Supplementary material for: Novel processing of lithium manganese silicate nanomaterials for Li-ion battery applications
Source: Royal Society of Chemistry journal article supplement (doi:10.1039/c2ra22409g), 2012-11-06
Supplement: c2ra22409g.pdf [file c2ra22409g.pdf]

# Novel processing of lithium manganese silicate nanomaterials for Li-ion battery applications

Murukanahally Kempaiah Devaraju\*, Takaaki Tomai, Atsushi Unemoto, and Itaru Honma\*

Institute of Multidisciplinary Research for Advanced Materials, Tohoku University,

2-1-1, Katahira, Aoba-ku, Sendai 980-8577, Japan

\* [devarajumk@rediffmail.com](mailto:devarajumk@rediffmail.com); [i.honma@tagen.tohoku.ac.jp](mailto:i.honma@tagen.tohoku.ac.jp)

## Supporting Information:

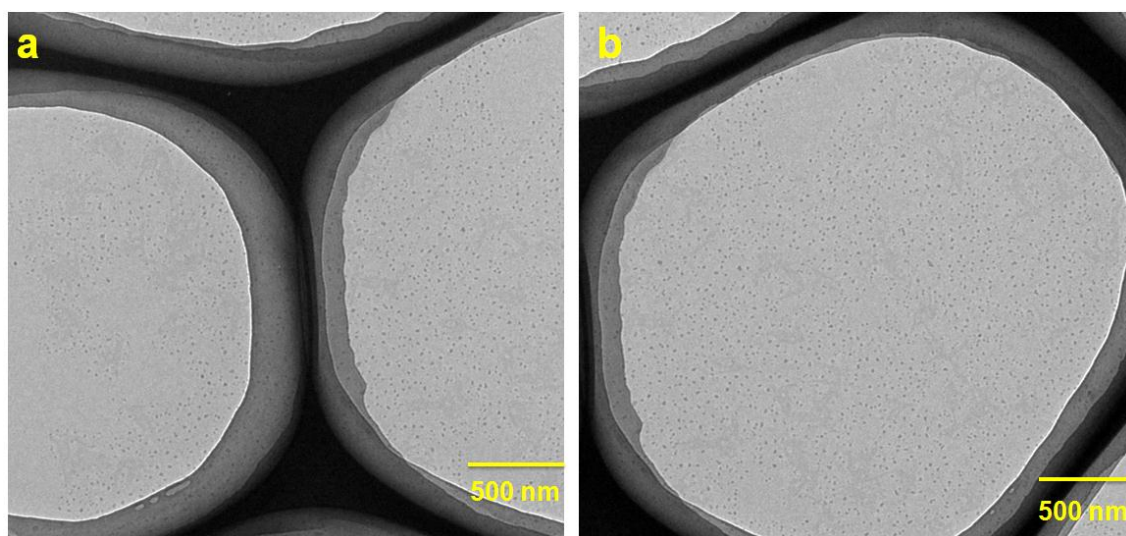

**Figure S1.** Low magnifications of  $\text{Li}_2\text{MnSiO}_4$  monodisperse nanoparticles showing homogeneous distribution of uniform size nanoparticles on copper grid.

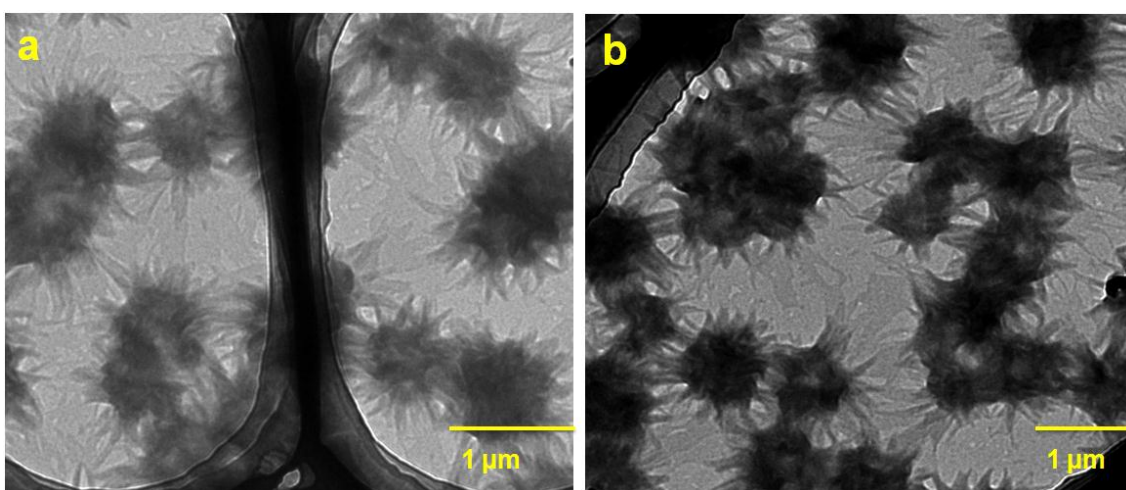

**Figure S2.** Low magnifications of  $\text{Li}_2\text{MnSiO}_4$  hierarchical nanostructures showing large number of flower like particles distributed on copper grid.

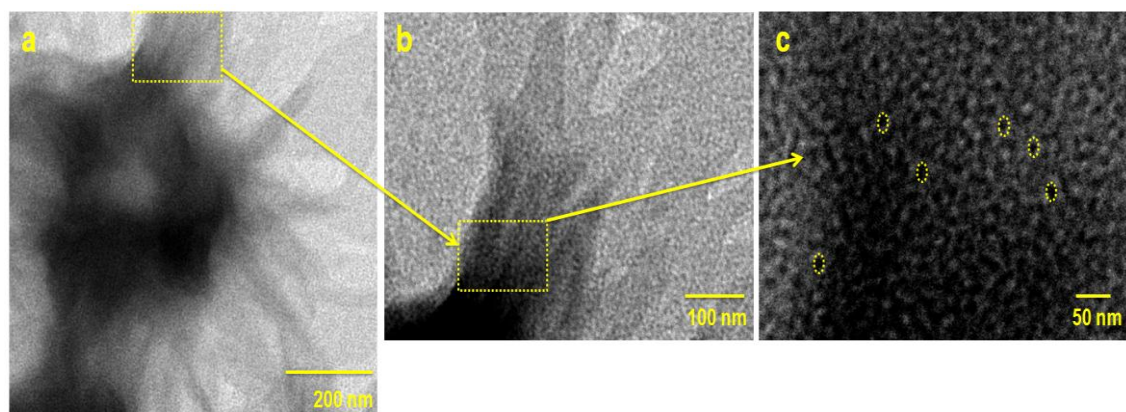

**Figure S3.**  $\text{Li}_2\text{MnSiO}_4$  hierarchical nanostructures at different magnifications synthesized via supercritical fluid process (Fig.a-c). The few monodisperse nanoparticles are yellow circled to indicate the presence of nanoparticles to support that hierarchical nanostructures are made up of nanoparticles (Fig.c).

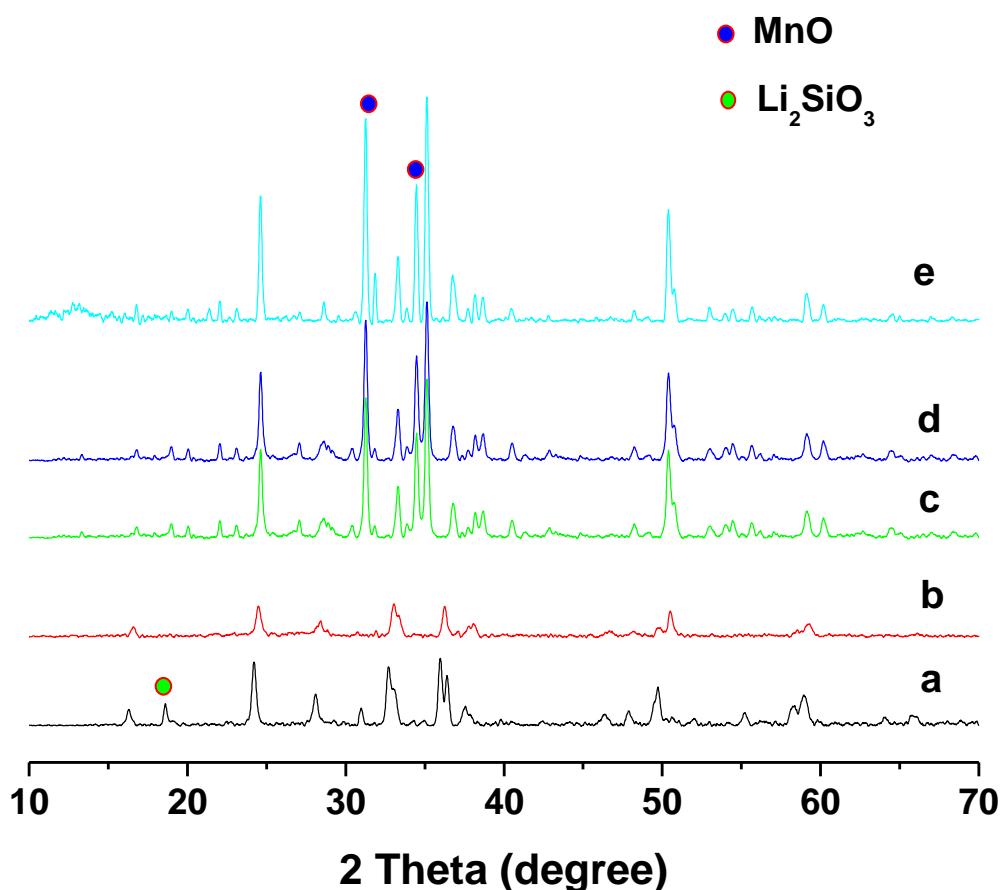

**Figure S4.** Powder X-ray diffraction (XRD) pattern of  $\text{Li}_2\text{MnSiO}_4$  cathode materials (a-e). (a) XRD pattern of monodisperse nanoparticles synthesized at 400 °C for 4 min, (b) hierarchical nanostructures synthesized at 400 °C for min by increasing the amount of oleic acid, (c) 30-50 nm size  $\text{Li}_2\text{MnSiO}_4$  particles synthesized at 400 °C for 4 min using oleylamine as surfactant in the presence of water and ethylene glycol as solvents, (d) 50-70 nm size  $\text{Li}_2\text{MnSiO}_4$  particles

synthesized at 400 °C for 4 min using oleylamine as surfactant in the presence of water and diethylene glycol as solvents, (e) 70-100 nm size  $\text{Li}_2\text{MnSiO}_4$  particles synthesized at 400 °C for 30 min using water as solvents and oxalic acid as reducing agent.

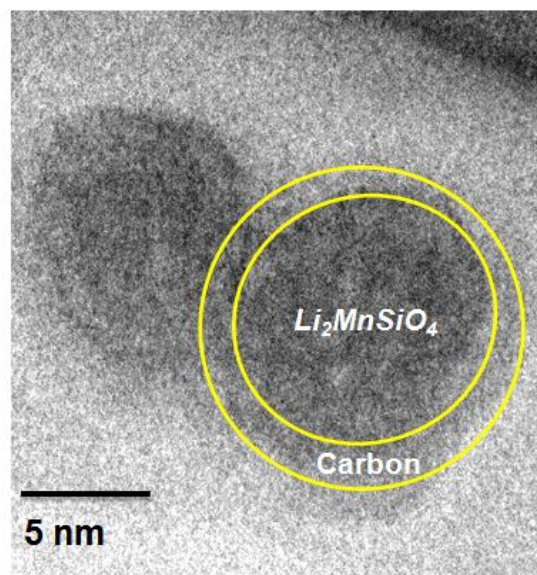

**Figure S5.** HRTEM image of carbon coated monodisperse  $\text{Li}_2\text{MnSiO}_4$  nanoparticles showing 2-3 nm of carbon layer around the particles.

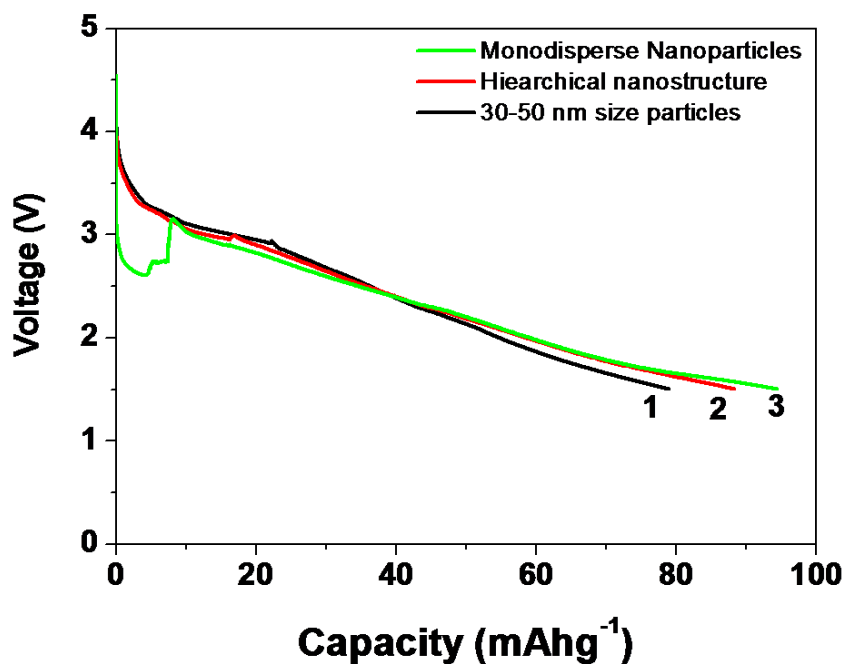

**Figure S6.** First cycle discharge capacities of as-synthesized monodisperse nanoparticles, hierarchical nanostructure and 30-50 nm size particles showing less capacity before carbon coating.

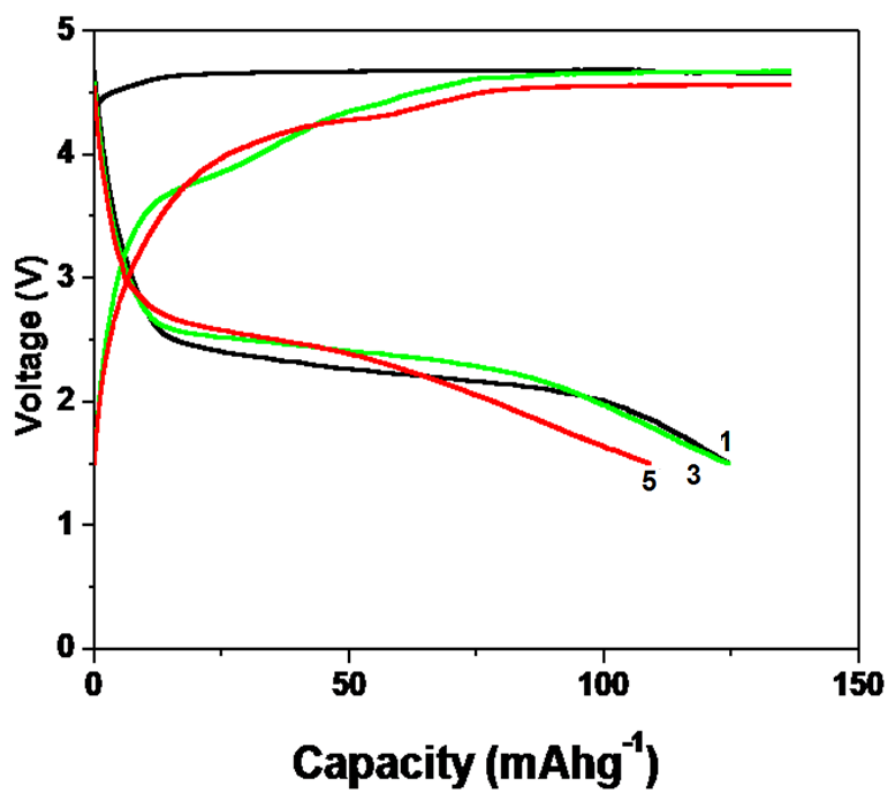

**Figure S7.** Charge-discharge of 70-100 nm size  $\text{Li}_2\text{MnSiO}_4$  particles at 0.05 C which was synthesized via supercritical fluid process. The low capacity with flat potential is observed for these particles, which is due to particle size and due to impure phase.

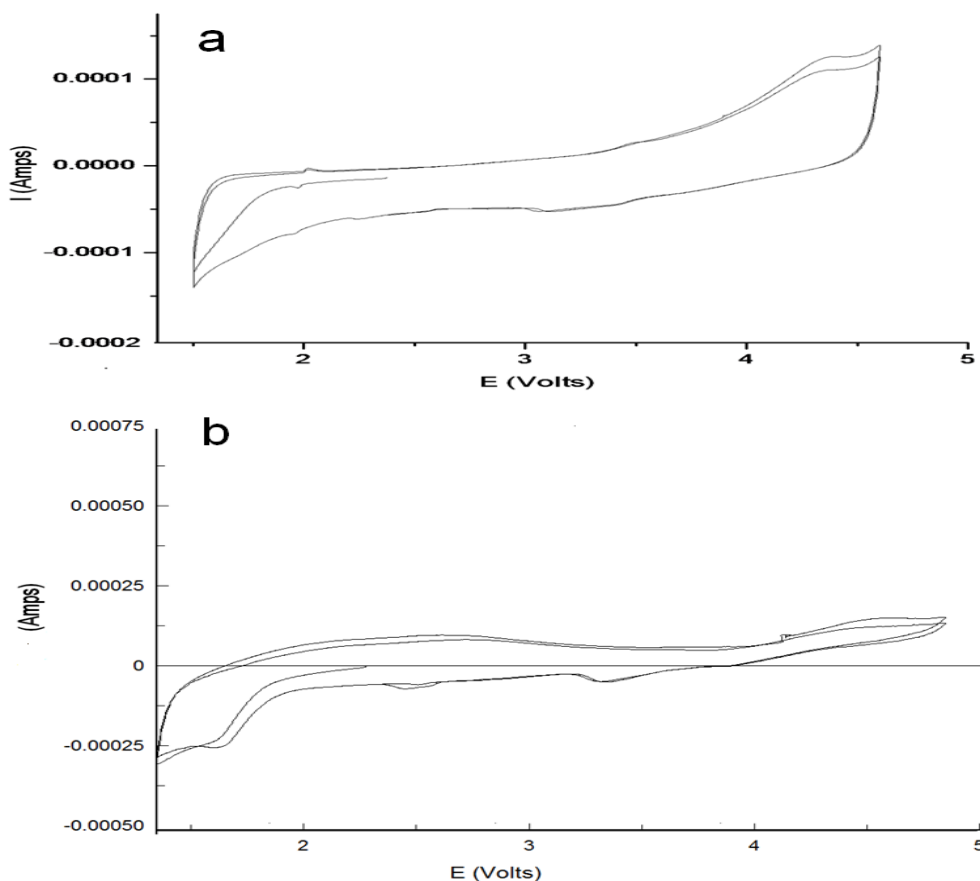

**Figure S8.** Cyclic voltammetry of monodisperse  $\text{Li}_2\text{MnSiO}_4$  nanoparticles (a) and hierarchical nanostructures synthesized via supercritical fluid process. The monodisperse nanoparticles and hierarchical nanostructures exhibited pair of redox peaks and hierarchical nanostructures showed much narrow separation than monodisperse nanoparticles indicating better cyclic performance.

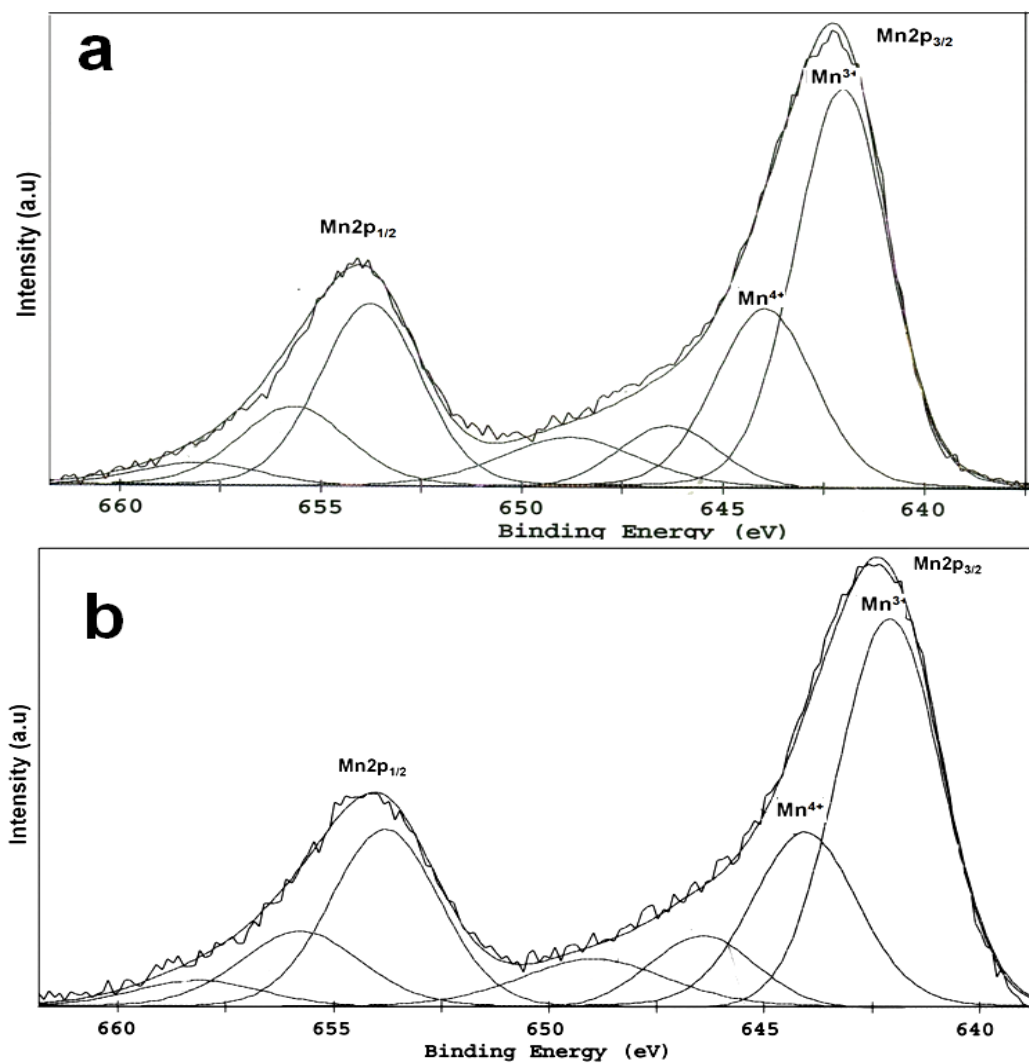

**Figure S9.** X-ray photoelectron spectroscopy of monodisperse Li<sub>2</sub>MnSiO<sub>4</sub> nanoparticles (a) and (b) hierarchical nanostructures synthesized via supercritical fluid process. The monodisperse nanoparticles and hierarchical nanostructures after charging to 4.8 V exhibited presence of Mn<sup>4+</sup> indicating the possibility of second lithium extraction.
